# Supplementary material for: Factors associated with provision of smoking cessation support to pregnant women – a cross-sectional survey of midwives in New South Wales, Australia
Source: Springer Nature journal article supplement (doi:10.1186/s12884-020-02912-0), 2020-04-15
Supplement: MOESM1 [file 17898350]

Additional file 1 for article: Factors associated with provision of smoking cessation support to pregnant women – a cross-sectional survey of midwives in New South Wales, Australia. *BMC Pregnancy and Childbirth*. Megan E. Passey, Jo M. Longman, Catherine Adams, Jennifer J Johnston, Jessica Simms, Margaret Rolfe. Corresponding author Megan Passey, University Centre for Rural Health, The University of Sydney, [megan.passey@sydney.edu.au](mailto:megan.passey@sydney.edu.au)

# Providing Smoking Cessation Support in Antenatal Care

## Survey Tool

Please answer questions in this survey thinking about your current role in public antenatal care

### Some questions about you:

Which LHD do you work in? (if more than one then please choose the one where you spend most of your time in antenatal care)

| LHD                   | Please tick ONE |
|-----------------------|-----------------|
| Central Coast         |                 |
| Far West              |                 |
| Hunter New England    |                 |
| Illawarra Shoalhaven  |                 |
| Mid North Coast       |                 |
| Murrumbidgee          |                 |
| Nepean Blue Mountains |                 |
| Northern NSW          |                 |
| Northern Sydney       |                 |
| South Eastern Sydney  |                 |
| Southern NSW          |                 |
| South Western Sydney  |                 |
| Sydney                |                 |
| Western NSW           |                 |
| Western Sydney        |                 |

How many years of midwifery experience have you had? \_\_\_\_\_ years

What model of antenatal care do you work in? Please tick all that apply and then select the one that you work most in, in antenatal care

| Model of antenatal care                | Please tick ALL that apply | Please tick ONE that is the model of antenatal care you mostly work in |
|----------------------------------------|----------------------------|------------------------------------------------------------------------|
| Team midwifery                         |                            |                                                                        |
| Midwifery group practice (normal risk) |                            |                                                                        |
| Midwifery group practice (all risk)    |                            |                                                                        |
| Midwife and GP Shared Care             |                            |                                                                        |
| Publically funded homebirth            |                            |                                                                        |
| Obstetric-led                          |                            |                                                                        |
| Obstetric led for high risk women      |                            |                                                                        |
| AMIHS                                  |                            |                                                                        |

What is the approximate number of births in the service where you provide most of your antenatal care?

| Size of service  | Please tick ONE |
|------------------|-----------------|
| ≤500 births      |                 |
| 501-2,000 births |                 |
| 2000+ births     |                 |

We are interested in your views on providing support for pregnant women to quit smoking.

Please indicate how much you agree or disagree with the following statements

|                                                                                                                                                  | Strongly agree | Agree | Not sure | Disagree | Strongly disagree | Domain* |
|--------------------------------------------------------------------------------------------------------------------------------------------------|----------------|-------|----------|----------|-------------------|---------|
| I am FAMILIAR with the guidelines for using the 5As for smoking cessation during antenatal care (Ask, Advise, Assess, Assist, Arrange Follow-up) | 1              | 2     | 3        | 4        | 5                 | Know    |
| I have good KNOWLEDGE of the harms of smoking in pregnancy                                                                                       | 1              | 2     | 3        | 4        | 5                 | Know    |
| I know how to provide smoking cessation support in antenatal care to help pregnant women quit                                                    | 1              | 2     | 3        | 4        | 5                 | Know    |
| I have good knowledge of nicotine addiction and the barriers to quitting smoking                                                                 | 1              | 2     | 3        | 4        | 5                 | Know    |
| I have good knowledge of the use of NRT in pregnancy                                                                                             | 1              | 2     | 3        | 4        | 5                 | Know    |
| I have the SKILLS required to determine and interpret pregnant women's nicotine dependence                                                       | 1              | 2     | 3        | 4        | 5                 | Skills  |
| I have good skills in MOTIVATING pregnant women who don't want to quit, to try to quit                                                           | 1              | 2     | 3        | 4        | 5                 | Skills  |
| I have good skills in assisting pregnant women with strategies to quit smoking                                                                   | 1              | 2     | 3        | 4        | 5                 | Skills  |
| I have good skills in assisting pregnant women who are struggling to quit                                                                        | 1              | 2     | 3        | 4        | 5                 | Skills  |
| I've had adequate training in assisting pregnant women to quit smoking                                                                           | 1              | 2     | 3        | 4        | 5                 | EC&R    |
| I often find talking with pregnant smokers about their smoking makes me feel uncomfortable                                                       | 1              | 2     | 3        | 4        | 5                 | Emot    |
| I am CONFIDENT assessing women's smoking status                                                                                                  | 1              | 2     | 3        | 4        | 5                 | BA Cap  |
| I am confident providing smoking cessation assistance to pregnant women                                                                          | 1              | 2     | 3        | 4        | 5                 | BA Cap  |
| I am confident arranging follow-up support for pregnant smokers                                                                                  | 1              | 2     | 3        | 4        | 5                 | BA Cap  |

|                                                                                                                                             |   |   |   |   |   |        |
|---------------------------------------------------------------------------------------------------------------------------------------------|---|---|---|---|---|--------|
| I INTEND to advise all pregnant smokers to quit                                                                                             | 1 | 2 | 3 | 4 | 5 | Int    |
| I intend to provide smoking cessation support to each pregnant smoker                                                                       | 1 | 2 | 3 | 4 | 5 | Int    |
| I intend to follow up with all smokers about their smoking at later visits (after the booking in visit)                                     | 1 | 2 | 3 | 4 | 5 | Int    |
| I always REMEMBER to advise women who smoke to quit smoking                                                                                 | 1 | 2 | 3 | 4 | 5 | M,A&DP |
| I always remember to provide smoking cessation support to smoking women at EVERY antenatal visit                                            | 1 | 2 | 3 | 4 | 5 | M,A&DP |
| Most women appreciate it when I discuss quitting smoking with them                                                                          | 1 | 2 | 3 | 4 | 5 | BA Con |
| I get satisfaction from providing smoking cessation support to pregnant women                                                               | 1 | 2 | 3 | 4 | 5 | Emot   |
| After the booking in visit, providing smoking cessation support is not as important to me as providing some other aspects of antenatal care | 1 | 2 | 3 | 4 | 5 | Goals  |
| I don't have time to provide smoking cessation support in visits after the booking in visit                                                 | 1 | 2 | 3 | 4 | 5 | EC&R   |
| I feel optimistic that providing smoking cessation support helps women quit smoking                                                         | 1 | 2 | 3 | 4 | 5 | Opt    |
| Advising women to quit smoking risks pushing them away from antenatal care                                                                  | 1 | 2 | 3 | 4 | 5 | BA Con |
| I think providing smoking cessation support for pregnant women increases the chances that they'll quit                                      | 1 | 2 | 3 | 4 | 5 | BA Con |
| Helping women quit smoking makes me feel proud of my role                                                                                   | 1 | 2 | 3 | 4 | 5 | PR&I   |
| Advising women to quit smoking is one of the main things that can be done to help women have healthy babies                                 | 1 | 2 | 3 | 4 | 5 | BA Con |
| Providing smoking cessation support to women is not worth it given the small level of success                                               | 1 | 2 | 3 | 4 | 5 | Opt    |
| Providing smoking cessation support for pregnant women is an important part of my role                                                      | 1 | 2 | 3 | 4 | 5 | PR&I   |
| Talking with women about quitting smoking is a good use of my time                                                                          | 1 | 2 | 3 | 4 | 5 | BA Con |
| Referring women to the Quitline is an effective way of assisting pregnant women to quit                                                     | 1 | 2 | 3 | 4 | 5 | BA Con |
| The harms of smoking in pregnancy are not as great as the other risks that women face                                                       | 1 | 2 | 3 | 4 | 5 | BA Con |

|                                                                                                                                                        |   |   |   |   |   |         |
|--------------------------------------------------------------------------------------------------------------------------------------------------------|---|---|---|---|---|---------|
| I place a high priority on helping women quit smoking                                                                                                  | 1 | 2 | 3 | 4 | 5 | Goals   |
| The team I work with places a high priority on addressing smoking with pregnant women                                                                  | 1 | 2 | 3 | 4 | 5 | Soc Inf |
| The clinic I work in values midwives who follow the 5As guidelines                                                                                     | 1 | 2 | 3 | 4 | 5 | Reinf   |
| I have systems in place (e.g. a checklist or stickers) to help me keep track of women who smoke and provide ongoing smoking cessation support for them | 1 | 2 | 3 | 4 | 5 | BR      |
| Our service has systems in place to help keep track of women who smoke and provide ongoing support for them                                            | 1 | 2 | 3 | 4 | 5 | EC&R    |
| Our service has good pamphlets and resources to support pregnant smokers to quit                                                                       | 1 | 2 | 3 | 4 | 5 | EC&R    |
| Our service has midwives, obstetricians and/or managers who really champion addressing smoking with our clients                                        | 1 | 2 | 3 | 4 | 5 | Soc Inf |
| Our service has capacity to provide smoking cessation support for pregnant smokers                                                                     | 1 | 2 | 3 | 4 | 5 | EC&R    |

*\* The domain name has been added for information but did not appear in the questionnaire. Key to domain names: Know = knowledge; Skills = skills; EC&R = environmental context and resources; Emot = emotions; BA Cap = beliefs about capabilities; Int = intentions; M,A&DP = memory, attention and decision processes; BA Con = beliefs about consequences; Goals = goals; Opt = optimism; PR&I = professional role and identity; Soc Inf = social influences; Reinf = reinforcement; BR = behavioural regulation.*

We are interested in your experience providing support for pregnant women to quit smoking.

Please indicate how frequently you do each of the following

|                                                                                                                           | Always | Usually | Sometimes | Seldom | Never | 5A*                        |
|---------------------------------------------------------------------------------------------------------------------------|--------|---------|-----------|--------|-------|----------------------------|
| How often do you give clear, strong messages urging every pregnant smoker to quit?                                        | 1      | 2       | 3         | 4      | 5     | Advise                     |
| How often do you identify and document cigarette smoking status for each pregnant patient at the booking in visit?        | 1      | 2       | 3         | 4      | 5     | Ask                        |
| During the booking in visit, how often do you assess whether pregnant women who smoke are willing to try to quit smoking? | 1      | 2       | 3         | 4      | 5     | Assess readiness           |
| How often do you assess whether pregnant women who smoke are willing to try to quit smoking at subsequent visits?         | 1      | 2       | 3         | 4      | 5     | Assess readiness           |
| For women who smoke, how often at the booking in visit do you assess how soon after waking she smokes?                    | 1      | 2       | 3         | 4      | 5     | Assess nicotine dependence |

|                                                                                                                                            | Always | Usually | Sometimes | Seldom | Never | 5A*                        |
|--------------------------------------------------------------------------------------------------------------------------------------------|--------|---------|-----------|--------|-------|----------------------------|
| For women who smoke, how often at the booking in visit do you assess how many cigarettes she smokes per day?                               | 1      | 2       | 3         | 4      | 5     | Assess nicotine dependence |
| How often do you assist pregnant women who smoke to quit by discussing barriers to quitting and ways to overcome these?                    | 1      | 2       | 3         | 4      | 5     | Assist                     |
| How often do you assist women who are not ready to quit smoking by discussing the benefits of quitting and the risks of continued smoking? | 1      | 2       | 3         | 4      | 5     | Assist                     |
| How often do you assist pregnant women who smoke to quit by advising on nicotine replacement therapy (NRT)?                                | 1      | 2       | 3         | 4      | 5     | Assist                     |
| How often do you provide self-help smoking cessation materials to pregnant women who smoke?                                                | 1      | 2       | 3         | 4      | 5     | Assist                     |
| How often do you refer pregnant smokers who are willing to quit to the Quitline or other quit smoking services?                            | 1      | 2       | 3         | 4      | 5     | Assist                     |
| For pregnant women attempting to quit, how often do you schedule follow-up contact to support their quit attempt?                          | 1      | 2       | 3         | 4      | 5     | Arrange follow-up          |

\* The 'A' that the item relates to has been added for information but did not appear in the questionnaire.

Finally, what is your own current smoking status?

| Own smoking status                      | Please tick ONE |
|-----------------------------------------|-----------------|
| I smoke every day                       |                 |
| I smoke occasionally, but not every day |                 |
| I'm an ex-smoker – I never smoke now    |                 |
| I have never smoked                     |                 |

THANK YOU we really appreciate the time you have taken to complete this survey.
