# Supplementary material for: Factors associated with provision of smoking cessation support to pregnant women – a cross-sectional survey of midwives in New South Wales, Australia
Source: Springer Nature journal article supplement (doi:10.1186/s12884-020-02912-0), 2020-04-15
Supplement: MOESM2 [file 17898350]

Additional file 2 for article: Factors associated with provision of smoking cessation support to pregnant women – a cross-sectional survey of midwives in New South Wales, Australia.

*BMC Pregnancy and Childbirth*. Megan E. Passey, Jo M. Longman, Catherine Adams, Jennifer J Johnston, Jessica Simms, Margaret Rolfe. Corresponding author Megan Passey, University Centre for Rural Health, The University of Sydney, [megan.passey@sydney.edu.au](mailto:megan.passey@sydney.edu.au)

**Table S1 – Factor loadings, Cronbach’s alpha and correlations for factor analysis of provision of the 5As from the Pattern matrix**

| Factor<br>(Cronbach’s<br>alpha)    | Item                                                                                                                                                         | Loading |
|------------------------------------|--------------------------------------------------------------------------------------------------------------------------------------------------------------|---------|
| Helping<br>(0.862)                 | How often do you assist pregnant women who smoke to quit by discussing barriers to quitting and ways to overcome these? ( <i>Assist</i> )                    | .895    |
|                                    | How often do you assist women who are not ready to quit smoking by discussing the benefits of quitting and the risks of continued smoking? ( <i>Assist</i> ) | .798    |
|                                    | For pregnant women attempting to quit, how often do you schedule follow-up contact to support their quit attempt? ( <i>Arrange follow-up</i> )               | .776    |
|                                    | How often do you provide self-help smoking cessation materials to pregnant women who smoke? ( <i>Assist</i> )                                                | .653    |
|                                    | How often do you assist pregnant women who smoke to quit by advising on nicotine replacement therapy (NRT)? ( <i>Assist</i> )                                | .610    |
|                                    | How often do you give clear, strong messages urging every pregnant smoker to quit? ( <i>Advice</i> )                                                         | .549    |
|                                    | How often do you refer pregnant smokers who are willing to quit to the Quitline or other quit smoking services? ( <i>Assist</i> )                            | .459    |
| Assessing<br>Quitting<br>(0.678)   | How often do you identify and document cigarette smoking status for each pregnant patient at the booking in visit? ( <i>Ask</i> )                            | .692    |
|                                    | How often do you assess whether pregnant women who smoke are willing to try to quit smoking at subsequent visits? ( <i>Assess readiness</i> )                | .559    |
|                                    | During the booking in visit how often do you assess whether pregnant women who smoke are willing to try to quit smoking? ( <i>Assess readiness</i> )         | .442    |
| Assessing<br>dependence<br>(0.577) | For women who smoke, how often at the booking in visit do you assess how soon after waking she smokes? ( <i>Assess nicotine dependence</i> )                 | .653    |
|                                    | For women who smoke, how often at the booking in visit do you assess how many cigarettes she smokes per day? ( <i>Assess nicotine dependence</i> )           | .652    |

Kaiser-Meyer-Olkin measure of sampling adequacy 0.877

Bartlett’s test of sphericity Chi squared=751.6 df=66 p<0.001

Anti-imaging correlations 0.695-0.926

Helping: Item-to-Total correlations 0.546-0.766; Item-to-item correlations 0.309-0.632

Assessing quitting: Item-to-total correlations 0.404-0.569; Item-to-item correlations 0.324-0.549

Assessing dependence: Item-to-total correlations 0.471; Item-to-item correlations 0.471

**Table S2. Frequency of responses to questions on the barriers and enablers to providing 5As (n=150)**

| <b>Questionnaire Items</b>                                                                                                                       | <b>Strongly agree<br/>%#</b> | <b>Agree<br/>%</b> | <b>Not sure<br/>%</b> | <b>Disagree<br/>%</b> | <b>Strongly Disagree<br/>%</b> | <b>Original TDF Domain*</b> |
|--------------------------------------------------------------------------------------------------------------------------------------------------|------------------------------|--------------------|-----------------------|-----------------------|--------------------------------|-----------------------------|
| <b>Capability</b>                                                                                                                                |                              |                    |                       |                       |                                |                             |
| I have good knowledge of the use of NRT in pregnancy                                                                                             | 14.7                         | 40.0               | 25.3                  | 16.0                  | 4.0                            | Know                        |
| I have good skills in assisting pregnant women who are struggling to quit                                                                        | 10.0                         | 37.3               | 30.7                  | 20.0                  | 2.0                            | Skills                      |
| I have good skills in assisting pregnant women with strategies to quit smoking                                                                   | 12.7                         | 52.7               | 19.3                  | 14.7                  | 0.7                            | Skills                      |
| I have the skills required to determine and interpret pregnant women's nicotine dependence                                                       | 15.3                         | 42.7               | 22.7                  | 15.3                  | 4.0                            | Skills                      |
| I know how to provide smoking cessation support in antenatal care to help pregnant women quit                                                    | 29.3                         | 54.0               | 12.0                  | 4.7                   | 0                              | Know                        |
| I have good knowledge of nicotine addiction and the barriers to quitting smoking                                                                 | 30.7                         | 50.0               | 12.0                  | 7.3                   | 0                              | Know                        |
| I am confident providing smoking cessation assistance to pregnant women                                                                          | 14.7                         | 50.7               | 22.0                  | 12.0                  | 0.7                            | BA Cap                      |
| I am confident assessing women's smoking status                                                                                                  | 15.3                         | 66.0               | 13.3                  | 4.7                   | 0.7                            | BA Cap                      |
| I am confident arranging follow-up support for pregnant smokers                                                                                  | 14.0                         | 42.7               | 27.3                  | 12.7                  | 3.3                            | BA Cap                      |
| I've had adequate training in assisting pregnant women to quit smoking                                                                           | 9.3                          | 32.0               | 20.7                  | 24.7                  | 13.3                           | EC&R                        |
| I have good skills in motivating pregnant women who don't want to quit, to try to quit                                                           | 14.0                         | 40.7               | 31.3                  | 13.3                  | 0.7                            | Skills                      |
| I am familiar with the guidelines for using the 5As for smoking cessation during antenatal care (Ask, Advise, Assess, Assist, Arrange Follow-up) | 20.7                         | 42.0               | 16.0                  | 18.7                  | 2.7                            | Know                        |
| <b>Intentions and memory</b>                                                                                                                     |                              |                    |                       |                       |                                |                             |
| I intend to provide smoking cessation support to each pregnant smoker                                                                            | 39.3                         | 53.3               | 6.0                   | 1.3                   | 0                              | Int                         |
| I intend to follow up with all smokers about their smoking at later visits (after the booking in visit)                                          | 30.0                         | 52.7               | 12.7                  | 3.3                   | 1.3                            | Int                         |
| I always remember to advise women who smoke to quit smoking                                                                                      | 34.0                         | 50.0               | 7.3                   | 8.7                   | 0                              | M,A&DP                      |
| I intend to advise all pregnant smokers to quit                                                                                                  | 46.7                         | 45.3               | 6.0                   | 2.0                   | 0                              | Int                         |
| I always remember to provide smoking cessation support to smoking women at every antenatal visit                                                 | 15.3                         | 38.7               | 24.0                  | 21.3                  | 0.7                            | M,A&DP                      |

| Questionnaire Items                                                                                                                         | Strongly agree<br>%# | Agree<br>% | Not sure<br>% | Disagree<br>% | Strongly Disagree<br>% | Original TDF Domain* |
|---------------------------------------------------------------------------------------------------------------------------------------------|----------------------|------------|---------------|---------------|------------------------|----------------------|
| <b>Work environment</b>                                                                                                                     |                      |            |               |               |                        |                      |
| Our service has good pamphlets and resources to support pregnant smokers to quit                                                            | 10.7                 | 56.0       | 16.0          | 15.3          | 2.0                    | EC&R                 |
| Our service has capacity to provide smoking cessation support for pregnant smokers                                                          | 11.3                 | 52.7       | 17.3          | 14.0          | 4.7                    | EC&R                 |
| Our service has midwives, obstetricians and/or managers who really champion addressing smoking with our clients                             | 7.3                  | 30.0       | 28.0          | 24.0          | 10.7                   | Soc Inf              |
| The clinic I work in values midwives who follow the 5As guidelines                                                                          | 8.7                  | 34.0       | 42.7          | 9.3           | 5.3                    | Reinf                |
| The team I work with places a high priority on addressing smoking with pregnant women                                                       | 13.3                 | 42.7       | 30.0          | 10.0          | 4.0                    | Soc Inf              |
| <b>Emotional reward</b>                                                                                                                     |                      |            |               |               |                        |                      |
| Helping women quit smoking makes me feel proud of my role                                                                                   | 16.7                 | 64.0       | 17.3          | 2.0           | 0                      | PR&I                 |
| I get satisfaction from providing smoking cessation support to pregnant women                                                               | 16.7                 | 62.0       | 17.3          | 4.0           | 0                      | Emot                 |
| I think providing smoking cessation support for pregnant women increases the chances that they'll quit                                      | 16.0                 | 63.3       | 17.3          | 3.3           | 0                      | BA Con               |
| I feel optimistic that providing smoking cessation support helps women quit smoking                                                         | 14.0                 | 46.7       | 30.0          | 9.3           | 0                      | Opt                  |
| Most women appreciate it when I discuss quitting smoking with them                                                                          | 11.3                 | 32.7       | 37.3          | 16.0          | 2.7                    | BA Con               |
| <b>Negative perceptions</b>                                                                                                                 |                      |            |               |               |                        |                      |
| I often find talking with pregnant smokers about their smoking makes me feel uncomfortable                                                  | 2.7                  | 19.3       | 7.3           | 51.3          | 19.3                   | Emot                 |
| Advising women to quit smoking risks pushing them away from antenatal care                                                                  | 0.7                  | 12.0       | 22.0          | 54.0          | 11.3                   | BA Con               |
| After the booking in visit, providing smoking cessation support is not as important to me as providing some other aspects of antenatal care | 0.7                  | 19.3       | 14.0          | 56.7          | 9.3                    | Goals                |
| I don't have time to provide smoking cessation support in visits after the booking in visit                                                 | 6.7                  | 16.7       | 14.0          | 55.3          | 7.3                    | EC&R                 |
| The harms of smoking in pregnancy are not as great as the other risks that women face                                                       | 0.7                  | 2.7        | 8.7           | 64.7          | 23.3                   | BA Con               |
| Providing smoking cessation support to women is not worth it given the small level of success                                               | 0.7                  | 3.3        | 7.3           | 61.3          | 27.3                   | Opt                  |
| <b>Personal priority</b>                                                                                                                    |                      |            |               |               |                        |                      |

| <b>Questionnaire Items</b>                                                                                                                             | <b>Strongly agree<br/>%#</b> | <b>Agree<br/>%</b> | <b>Not sure<br/>%</b> | <b>Disagree<br/>%</b> | <b>Strongly Disagree<br/>%</b> | <b>Original TDF Domain*</b> |
|--------------------------------------------------------------------------------------------------------------------------------------------------------|------------------------------|--------------------|-----------------------|-----------------------|--------------------------------|-----------------------------|
| Providing smoking cessation support for pregnant women is an important part of my role                                                                 | 26.0                         | 66.7               | 5.3                   | 2.0                   | 0                              | PR&I                        |
| Talking with women about quitting smoking is a good use of my time                                                                                     | 23.3                         | 63.3               | 10.0                  | 3.3                   | 0                              | BA Con                      |
| I place a high priority on helping women quit smoking                                                                                                  | 19.3                         | 48.7               | 24.0                  | 8.0                   | 0                              | Goals                       |
| <b>Tracking systems</b>                                                                                                                                |                              |                    |                       |                       |                                |                             |
| I have systems in place (e.g. a checklist or stickers) to help me keep track of women who smoke and provide ongoing smoking cessation support for them | 6.0                          | 23.3               | 16.0                  | 38.7                  | 16.0                           | BR                          |
| Our service has systems in place to help keep track of women who smoke and provide ongoing support for them                                            | 4.7                          | 24.7               | 22.7                  | 32.7                  | 15.3                           | EC&R                        |
| <b>Main things</b>                                                                                                                                     |                              |                    |                       |                       |                                |                             |
| Advising women to quit smoking is one of the main things that can be done to help women have healthy babies                                            | 31.3                         | 55.3               | 8.7                   | 4.7                   | 0                              | BA Con                      |
| <b>Quitline</b>                                                                                                                                        |                              |                    |                       |                       |                                |                             |
| Referring women to the Quitline is an effective way of assisting pregnant women to quit                                                                | 16.0                         | 45.3               | 33.3                  | 4.7                   | 0.7                            | BA Con                      |
| <b>Not included in factor analysis</b>                                                                                                                 |                              |                    |                       |                       |                                |                             |
| I have good knowledge of the harms of smoking in pregnancy                                                                                             | 59.3                         | 39.3               | 1.3                   | 0                     | 0                              | Know                        |

\* Note that these items have been grouped under the constructs identified in the factor analysis presented in the paper.

# Percentages may not total 100% due to rounding errors.

Key to domain names: Know = knowledge; Skills = skills; EC&R = environmental context and resources; Emot = emotions; BA Cap = beliefs about capabilities; Int = intentions; M,A&DP = memory, attention and decision processes; BA Con = beliefs about consequences; Goals = goals; Opt = optimism; PR&I = professional role and identity; Soc Inf = social influences; Reinf = reinforcement; BR = behavioural regulation.
